# Supplementary material for: M3MoO4(HCO3) (M = Rb and Cs): cation-tuned synthesis of two noncentrosymmetric molybdate-carbonates with isolated [MoO4] and [HCO3] groups
Source: Royal Society of Chemistry journal article supplement (doi:10.1039/d4tc05261g), 2025-01-01

## Supplementary Information (SI)

### **M<sub>3</sub>MoO<sub>4</sub>(HCO<sub>3</sub>) (M = Rb, Cs): Cation-tuned synthesis of two noncentrosymmetric molybdate-carbonates with isolated [MoO<sub>4</sub>] and [HCO<sub>3</sub>] groups**

Jianlong Huang,<sup>a</sup> Wenhui Wang,<sup>b</sup> JuanJuan Lu<sup>c\*</sup> and Feng Yu<sup>a\*</sup>

<sup>a</sup>Key Laboratory for Green Processing of Chemical Engineering of XinjiangBingtuan, School of Chemistry and Chemical Engineering, Shihezi University, Shihezi 832003, China.

<sup>b</sup>School of Physical Science and Technology, Xinjiang University, 666 Shengli Road, Urumqi, 830046, China.

<sup>c</sup>Research Center for Crystal Materials; State Key Laboratory of Functional Materials and Devices for Special Environmental Conditions; Xinjiang Key Laboratory of Functional Crystal Materials; Xinjiang Technical Institute of Physics and Chemistry, Chinese Academy of Sciences, 40-1 South Beijing Road, Urumqi 830011, China.

\*Corresponding author: [lujuan@ms.xjb.ac.cn](mailto:lujuan@ms.xjb.ac.cn); [yufeng05@mail.ipc.ac.cn](mailto:yufeng05@mail.ipc.ac.cn).

## Contents

- Table S1** Crystal data and structure refinement for  $\text{Rb}_3\text{MoO}_4(\text{HCO}_3)$  and  $\text{Cs}_3\text{MoO}_4(\text{HCO}_3)$ .
- Table S2** Atomic coordinates ( $\times 10^4$ ), equivalent isotropic displacement parameters ( $\text{\AA}^2 \times 10^3$ ) and bond valence sums (BVS) for  $\text{Rb}_3\text{MoO}_4(\text{HCO}_3)$ .  $U_{\text{eq}}$  is defined as one-third of the trace of the orthogonalized  $U_{ij}$  tensor.
- Table S3** Atomic coordinates ( $\times 10^4$ ), equivalent isotropic displacement parameters ( $\text{\AA}^2 \times 10^3$ ) and bond valence sums (BVS) for  $\text{Cs}_3\text{MoO}_4(\text{HCO}_3)$ .  $U_{\text{eq}}$  is defined as one-third of the trace of the orthogonalized  $U_{ij}$  tensor.
- Table S4** Bond distances [ $\text{\AA}$ ] and angles [ $^\circ$ ] for  $\text{Rb}_3\text{MoO}_4(\text{HCO}_3)$ .
- Table S5** Bond distances [ $\text{\AA}$ ] and angles [ $^\circ$ ] for  $\text{Cs}_3\text{MoO}_4(\text{HCO}_3)$ .
- Table S6** Carbonates with cut-off edge reported.
- Figure S1** Experimental and theoretical powder XRD patterns for  $\text{Rb}_3\text{MoO}_4(\text{HCO}_3)$  (a) and  $\text{Cs}_3\text{MoO}_4(\text{HCO}_3)$  (b).
- Figure S2** The arrangement of  $[\text{MoO}_4]$  tetrahedral groups of  $\text{Rb}_3\text{MoO}_4(\text{HCO}_3)$  (a) (b) and  $\text{Cs}_3\text{MoO}_4(\text{HCO}_3)$  (c) (d).
- Figure S3** The cationic coordination environment of  $\text{M}_3\text{MoO}_4(\text{HCO}_3)$  ( $\text{M} = \text{Rb}, \text{Cs}$ ).
- Figure S4** The crystal structure of  $\text{Cs}_3\text{MoO}_4(\text{HCO}_3)$ .
- Figure S5** The adjacent plane  $[\text{HCO}_3]$  anion groups' dihedral angle of  $\text{Rb}_3\text{MoO}_4(\text{HCO}_3)$  (a) and  $\text{Cs}_3\text{MoO}_4(\text{HCO}_3)$  (b).
- Figure S6** FTIR spectra for  $\text{Rb}_3\text{MoO}_4(\text{HCO}_3)$  (a) and  $\text{Cs}_3\text{MoO}_4(\text{HCO}_3)$  (b).
- Figure S7** The UV-vis absorption spectra for  $\text{Rb}_3\text{MoO}_4(\text{HCO}_3)$  (a) and  $\text{Cs}_3\text{MoO}_4(\text{HCO}_3)$  (b).
- Figure S8** SHG density of the virtual electron occupied and unoccupied states for  $\text{Rb}_3\text{MoO}_4(\text{HCO}_3)$  (a) (b) and  $\text{Cs}_3\text{MoO}_4(\text{HCO}_3)$  (c) (d).

Table S1. Crystal data and structure refinement for Rb<sub>3</sub>MoO<sub>4</sub>(HCO<sub>3</sub>) and Cs<sub>3</sub>MoO<sub>4</sub>(HCO<sub>3</sub>).

| Formula                                                                   | Rb <sub>3</sub> MoO <sub>4</sub> (HCO <sub>3</sub> )                   | Cs <sub>3</sub> MoO <sub>4</sub> (HCO <sub>3</sub> )                   |
|---------------------------------------------------------------------------|------------------------------------------------------------------------|------------------------------------------------------------------------|
| Formula weight                                                            | 477.37                                                                 | 619.69                                                                 |
| Temperature / K                                                           | 298.15                                                                 | 293.0                                                                  |
| Crystal system                                                            | Orthorhombic                                                           | Orthorhombic                                                           |
| Space group                                                               | <i>Pna2</i> <sub>1</sub>                                               | <i>Pna2</i> <sub>1</sub>                                               |
| <i>a</i> / Å                                                              | 16.4966(7)                                                             | 17.2074(7)                                                             |
| <i>b</i> / Å                                                              | 6.2117(3)                                                              | 6.4605(2)                                                              |
| <i>c</i> / Å                                                              | 17.7267(10)                                                            | 18.3641(6)                                                             |
| $\alpha$ / °                                                              | 90                                                                     | 90                                                                     |
| $\beta$ / °                                                               | 90                                                                     | 90                                                                     |
| $\gamma$ / °                                                              | 90                                                                     | 90                                                                     |
| Volume / Å <sup>3</sup>                                                   | 1816.49(16)                                                            | 2041.51(12)                                                            |
| <i>Z</i>                                                                  | 8                                                                      | 8                                                                      |
| $\rho_{\text{calc}}$ / Mg cm <sup>-3</sup>                                | 3.491                                                                  | 4.032                                                                  |
| $\mu$ / mm <sup>-1</sup>                                                  | 17.414                                                                 | 11.826                                                                 |
| <i>F</i> (000)                                                            | 1728                                                                   | 2160                                                                   |
| Radiation                                                                 | Mo K $\alpha$ ( $\lambda$ = 0.71073)                                   | Mo K $\alpha$ ( $\lambda$ = 0.71073)                                   |
| 2 $\theta$ range for data collection/ °                                   | 4.596 to 55.012                                                        | 4.436 to 55.018                                                        |
| Index ranges                                                              | -21 ≤ <i>h</i> ≤ 20, -8 ≤ <i>k</i> ≤ 8, -23 ≤ <i>l</i> ≤ 23            |                                                                        |
|                                                                           | 22                                                                     | 23                                                                     |
| Reflections collected / unique                                            | 33213 / 4164 [R(int) = 0.0988]                                         | 49951 / 4642 [R(int) = 0.0663]                                         |
| Completeness / %                                                          | 99.9                                                                   | 99.9                                                                   |
| Data / restraints / parameters                                            | 4164 / 3 / 227                                                         | 4642 / 9 / 227                                                         |
| Goodness-of-fit on <i>F</i> <sup>2</sup>                                  | 1.035                                                                  | 1.130                                                                  |
| Final <i>R</i> indices [ <i>I</i> ≥ 2 $\sigma$ ( <i>I</i> )] <sup>a</sup> | <i>R</i> <sub><i>I</i></sub> = 0.0340, <i>wR</i> <sub>2</sub> = 0.0759 | <i>R</i> <sub><i>I</i></sub> = 0.0196, <i>wR</i> <sub>2</sub> = 0.0429 |
| Final <i>R</i> indices (all data) <sup>a</sup>                            | <i>R</i> <sub><i>I</i></sub> = 0.0421, <i>wR</i> <sub>2</sub> = 0.0807 | <i>R</i> <sub><i>I</i></sub> = 0.0227, <i>wR</i> <sub>2</sub> = 0.0452 |
| Largest diff. peak / hole / e Å <sup>-3</sup>                             | 1.319 / - 0.743                                                        | 0.971 / - 0.730                                                        |

<sup>a</sup>  $R_1 = \sum ||F_o| - |F_c|| / \sum |F_o|$  and  $wR_2 = [\sum w (F_o^2 - F_c^2)^2 / \sum w F_o^4]^{1/2}$  for  $F_o^2 > 2\sigma(F_o^2)$

**Table S2** Atomic coordinates ( $\times 10^4$ ), equivalent isotropic displacement parameters ( $\text{\AA}^2 \times 10^3$ ), and bond valence sums (BVS) for  $\text{Rb}_3\text{MoO}_4(\text{HCO}_3)$ .  $U_{\text{eq}}$  is defined as one-third of the trace of the orthogonalized  $U_{ij}$  tensor.

| Atoms | x         | y         | z        | $U_{\text{eq}}$ | BVS  |
|-------|-----------|-----------|----------|-----------------|------|
| Rb(1) | 8740(1)   | 2940(2)   | 3633(1)  | 31(1)           | 0.88 |
| Rb(2) | 7286(1)   | 2669(2)   | 5410(2)  | 31(1)           | 0.95 |
| Rb(3) | 4636(1)   | -2615(2)  | 2295(1)  | 25(1)           | 1.19 |
| Rb(4) | 5199(1)   | -2531(2)  | 4594(2)  | 31(1)           | 1.07 |
| Rb(5) | 2867(1)   | 2248(2)   | 7720(1)  | 24(1)           | 1.20 |
| Rb(6) | -1250(1)  | 7985(2)   | 6368(1)  | 30(1)           | 0.89 |
| Mo(1) | 6062(1)   | 2463(1)   | 3583(1)  | 18(1)           | 6.08 |
| Mo(2) | 1433(1)   | 7285(1)   | 6437(1)  | 18(1)           | 6.38 |
| C(1)  | 4212(7)   | 1882(19)  | 5745(6)  | 20(2)           | 4.12 |
| C(2)  | -1731(8)  | 8134(18)  | 4270(6)  | 22(2)           | 3.97 |
| O(1)  | 7104(7)   | 1962(15)  | 3538(9)  | 50(3)           | 1.98 |
| O(2)  | 5815(7)   | 4706(16)  | 3031(8)  | 54(3)           | 2.00 |
| O(3)  | 5536(6)   | 192(14)   | 3250(7)  | 42(3)           | 2.00 |
| O(4)  | 5779(10)  | 2911(17)  | 4522(11) | 48(3)           | 1.86 |
| O(5)  | 4881(6)   | 3131(14)  | 5717(5)  | 27(2)           | 2.39 |
| O(6)  | 4073(4)   | 618(12)   | 5213(4)  | 30(2)           | 1.98 |
| O(7)  | 3806(7)   | 2086(14)  | 6324(9)  | 33(3)           | 2.15 |
| O(8)  | 1902(8)   | 5123(17)  | 6860(9)  | 57(3)           | 2.12 |
| O(9)  | 1755(8)   | 9667(18)  | 6833(9)  | 67(4)           | 2.07 |
| O(10) | 1650(13)  | 7276(16)  | 5458(13) | 62(4)           | 1.78 |
| O(11) | 397(8)    | 7030(17)  | 6527(11) | 64(4)           | 2.03 |
| O(12) | -1566(4)  | 9397(12)  | 4791(4)  | 30(2)           | 1.99 |
| O(13) | -1302(7)  | 7805(13)  | 3678(10) | 31(3)           | 1.98 |
| O(14) | -2404(6)  | 6929(15)  | 4320(5)  | 27(2)           | 2.39 |
| H(5)  | 5110(70)  | 2760(140) | 5310(40) | 0(30)           | /    |
| H(14) | -2660(70) | 7080(170) | 4730(40) | 10(30)          | /    |

**Table S3** Atomic coordinates ( $\times 10^4$ ), equivalent isotropic displacement parameters ( $\text{\AA}^2 \times 10^3$ ), and bond valence sums (BVS) for  $\text{Cs}_3\text{MoO}_4(\text{HCO}_3)$ .  $U_{\text{eq}}$  is defined as one-third of the trace of the orthogonalized  $U_{ij}$  tensor.

| Atoms | x         | y         | z        | $U_{\text{eq}}$ | BVS  |
|-------|-----------|-----------|----------|-----------------|------|
| Cs(1) | 7094(1)   | 7672(1)   | 2256(1)  | 26(1)           | 1.16 |
| Cs(2) | 11241(1)  | 2172(1)   | 3601(1)  | 29(1)           | 0.91 |
| Cs(3) | 7729(1)   | 7626(1)   | 4596(1)  | 28(1)           | 1.02 |
| Cs(4) | 9774(1)   | 2469(1)   | 5397(1)  | 29(1)           | 0.97 |
| Cs(5) | 1272(1)   | 7158(1)   | 6401(1)  | 30(1)           | 0.85 |
| Cs(6) | 5404(1)   | 2624(1)   | 7727(1)  | 26(1)           | 1.15 |
| Mo(1) | 8524(1)   | 2682(1)   | 3565(1)  | 19(1)           | 6.26 |
| Mo(2) | 3978(1)   | 7550(1)   | 6417(1)  | 19(1)           | 6.03 |
| C(1)  | 6743(6)   | 3063(15)  | 5709(5)  | 26(2)           | 3.97 |
| C(2)  | 5786(5)   | 8042(14)  | 4293(5)  | 20(2)           | 4.05 |
| O(1)  | 6169(7)   | 7746(10)  | 3728(8)  | 33(3)           | 2.09 |
| O(2)  | 5117(4)   | 6890(12)  | 4340(5)  | 32(2)           | 2.31 |
| O(3)  | 5940(3)   | 9273(9)   | 4787(3)  | 30(1)           | 2.02 |
| O(4)  | 8109(6)   | 4850(14)  | 3172(7)  | 43(2)           | 2.10 |
| O(5)  | 8188(6)   | 430(14)   | 3175(7)  | 50(2)           | 2.11 |
| O(6)  | 9538(7)   | 2809(12)  | 3532(8)  | 47(3)           | 1.92 |
| O(7)  | 8237(12)  | 2643(10)  | 4489(9)  | 50(4)           | 1.79 |
| O(8)  | 6555(3)   | 4299(9)   | 5211(3)  | 32(1)           | 1.92 |
| O(9)  | 6368(7)   | 2732(9)   | 6297(8)  | 28(2)           | 1.98 |
| O(10) | 7387(4)   | 1938(13)  | 5641(4)  | 32(2)           | 2.43 |
| O(11) | 2988(7)   | 7836(13)  | 6508(9)  | 58(3)           | 2.03 |
| O(12) | 4244(9)   | 7373(10)  | 5494(7)  | 38(3)           | 1.82 |
| O(13) | 4420(5)   | 9739(14)  | 6830(7)  | 42(2)           | 1.91 |
| O(14) | 4271(6)   | 5316(14)  | 6900(7)  | 49(2)           | 1.93 |
| H(2)  | 4840(80)  | 7470(130) | 4670(60) | 30(40)          | /    |
| H(10) | 7530(120) | 2590(180) | 5260(50) | 80(90)          | /    |

**Table S4** Bond distances [ $\text{\AA}$ ] and angles [ $^\circ$ ] for  $\text{Rb}_3\text{MoO}_4(\text{HCO}_3)$ .

|                |           |                         |          |
|----------------|-----------|-------------------------|----------|
| C(1)-O(5)      | 1.351(14) | O(1)-Rb(1)-O(3)#4       | 162.2(4) |
| C(1)-O(6)      | 1.248(12) | O(1)-Rb(1)-O(6)#4       | 107.6(3) |
| C(1)-O(7)      | 1.231(18) | O(1)-Rb(1)-O(8)#10      | 74.2(4)  |
| C(2)-O(12)     | 1.243(13) | O(1)-Rb(1)-O(12)#16     | 73.9(3)  |
| C(2)-O(13)     | 1.281(19) | O(1)-Rb(1)-O(13)#17     | 101.5(3) |
| C(2)-O(14)     | 1.342(15) | O(1)-Rb(1)-O(13)#16     | 76.2(3)  |
| Mo(1)-O(1)     | 1.750(12) | O(1)-Rb(1)-O(14)#17     | 68.6(3)  |
| Mo(1)-O(2)     | 1.751(11) | O(3)#4-Rb(1)-O(8)#10    | 88.0(3)  |
| Mo(1)-O(3)     | 1.758(9)  | O(3)#4-Rb(1)-O(14)#17   | 109.0(2) |
| Mo(1)-O(4)     | 1.751(18) | O(6)#4-Rb(1)-O(3)#4     | 85.5(3)  |
| Mo(2)-O(8)     | 1.721(10) | O(6)#4-Rb(1)-O(8)#10    | 141.9(2) |
| Mo(2)-O(9)     | 1.722(10) | O(6)#4-Rb(1)-O(12)#16   | 67.4(2)  |
| Mo(2)-O(10)    | 1.77(2)   | O(6)#4-Rb(1)-O(13)#16   | 106.2(3) |
| Mo(2)-O(11)    | 1.725(13) | O(6)#4-Rb(1)-O(13)#17   | 71.3(4)  |
| Rb(1)-O(1)     | 2.770(12) | O(6)#4-Rb(1)-O(14)#17   | 62.7(2)  |
| Rb(1)-O(3)#4   | 3.254(13) | O(12)#16-Rb(1)-O(3)#4   | 123.2(2) |
| Rb(1)-O(6)#4   | 2.993(14) | O(12)#16-Rb(1)-O(8)#10  | 142.7(3) |
| Rb(1)-O(8)#10  | 3.528(60) | O(12)#16-Rb(1)-O(13)#16 | 42.1(3)  |
| Rb(1)-O(12)#16 | 3.052(14) | O(12)#16-Rb(1)-O(14)#17 | 101.3(2) |
| Rb(1)-O(13)#17 | 3.024(11) | O(13)#16-Rb(1)-O(3)#4   | 112.4(3) |
| Rb(1)-O(13)#16 | 3.192(13) | O(13)#17-Rb(1)-O(3)#4   | 70.7(3)  |
| Rb(1)-O(14)#17 | 3.344(10) | O(13)#17-Rb(1)-O(8)#10  | 71.1(4)  |
| Rb(2)-O(1)     | 3.361(11) | O(13)#16-Rb(1)-O(8)#10  | 110.9(4) |
| Rb(2)-O(4)     | 2.947(12) | O(13)#17-Rb(1)-O(12)#16 | 134.4(3) |
| Rb(2)-O(6)#4   | 3.153(10) | O(13)#17-Rb(1)-O(13)#16 | 176.1(5) |
| Rb(2)-O(7)#4   | 2.989(02) | O(13)#17-Rb(1)-O(14)#17 | 40.3(3)  |
| Rb(2)-O(8)#4   | 3.164(11) | O(13)#16-Rb(1)-O(14)#17 | 136.0(3) |
| Rb(2)-O(9)#3   | 3.141(12) | O(14)#17-Rb(1)-O(8)#10  | 84.4(2)  |
| Rb(2)-O(10)#4  | 3.247(15) | O(4)-Rb(2)-O(1)         | 53.4(4)  |
| Rb(2)-O(12)#16 | 2.987(10) | O(4)-Rb(2)-O(6)#4       | 135.4(4) |
| Rb(2)-O(14)#17 | 3.316(10) | O(4)-Rb(2)-O(7)#4       | 174.1(3) |
| Rb(3)-O(2)#19  | 2.873(8)  | O(4)-Rb(2)-O(8)#4       | 107.0(4) |
| Rb(3)-O(3)     | 2.848(7)  | O(4)-Rb(2)-O(9)#3       | 99.6(4)  |
| Rb(3)-O(5)#9   | 2.927(7)  | O(4)-Rb(2)-O(10)#4      | 77.8(5)  |
| Rb(3)-O(7)#9   | 3.111(7)  | O(4)-Rb(2)-O(10)#3      | 72.4(4)  |
| Rb(3)-O(8)#11  | 3.150(14) | O(4)-Rb(2)-O(12)#16     | 111.9(3) |
| Rb(3)-O(9)#18  | 2.964(14) | O(4)-Rb(2)-O(14)#17     | 77.2(3)  |
| Rb(3)-O(11)#11 | 3.191(16) | O(6)#4-Rb(2)-O(1)       | 91.0(3)  |
| Rb(3)-O(13)#4  | 2.901(9)  | O(6)#4-Rb(2)-O(8)#4     | 117.5(3) |
| Rb(4)-O(2)#19  | 3.414(16) | O(6)#4-Rb(2)-O(9)#3     | 99.9(3)  |
| Rb(4)-O(3)     | 2.975(16) | O(6)#4-Rb(2)-O(10)#4    | 128.6(4) |
| Rb(4)-O(4)#19  | 2.991(13) | O(6)#4-Rb(2)-O(10)#3    | 88.8(4)  |
| Rb(4)-O(4)     | 3.516(11) | O(6)#4-Rb(2)-O(14)#17   | 61.5(2)  |

|                       |           |                         |          |
|-----------------------|-----------|-------------------------|----------|
| Rb(4)-O(5)#19         | 3.391(13) | O(7)#4-Rb(2)-O(1)       | 128.1(4) |
| Rb(4)-O(6)            | 2.912(17) | O(7)#4-Rb(2)-O(6)#4     | 42.1(3)  |
| Rb(4)-O(10)#4         | 2.846(14) | O(7)#4-Rb(2)-O(8)#4     | 75.9(4)  |
| Rb(4)-O(11)#4         | 3.456(11) | O(7)#4-Rb(2)-O(9)#3     | 76.8(4)  |
| Rb(4)-O(12)#4         | 3.153(12) | O(7)#4-Rb(2)-O(10)#4    | 107.8(4) |
| Rb(4)-O(13)#4         | 2.966(12) | O(7)#4-Rb(2)-O(10)#3    | 101.8(4) |
| Rb(5)-O(1)#2          | 2.991(2)  | O(7)#4-Rb(2)-O(12)#16   | 72.6(3)  |
| Rb(5)-O(2)#12         | 2.934(14) | O(7)#4-Rb(2)-O(14)#17   | 98.4(3)  |
| Rb(5)-O(3)#2          | 3.181(11) | O(8)#4-Rb(2)-O(1)       | 135.4(3) |
| Rb(5)-O(7)            | 2.92(16)  | O(8)#4-Rb(2)-O(10)#4    | 52.8(4)  |
| Rb(5)-O(8)            | 2.836(13) | O(8)#4-Rb(2)-O(10)#3    | 115.8(4) |
| Rb(5)-O(9)#19         | 2.899(8)  | O(8)#4-Rb(2)-O(14)#17   | 160.3(3) |
| Rb(5)-O(13)#20        | 3.091(7)  | O(9)#3-Rb(2)-O(1)       | 146.8(3) |
| Rb(5)-O(14)#20        | 2.982(7)  | O(9)#3-Rb(2)-O(8)#4     | 65.2(4)  |
| Rb(6)-O(2)#15         | 3.217(8)  | O(9)#3-Rb(2)-O(10)#4    | 112.8(4) |
| Rb(6)-O(5)#13         | 3.261(8)  | O(9)#3-Rb(2)-O(10)#3    | 52.5(4)  |
| Rb(6)-O(6)#1          | 3.079(8)  | O(9)#3-Rb(2)-O(14)#17   | 95.2(3)  |
| Rb(6)-O(7)#13         | 3.064(16) | O(10)#4-Rb(2)-O(1)      | 82.7(4)  |
| Rb(6)-O(8)#13         | 3.382(14) | O(10)#3-Rb(2)-O(1)      | 96.9(4)  |
| Rb(6)-O(11)           | 2.796(15) | O(10)#4-Rb(2)-O(10)#3   | 142.5(7) |
| Rb(6)-O(12)           | 2.976(10) | O(10)#3-Rb(2)-O(14)#17  | 46.2(4)  |
| O(6)-C(1)-O(5)        | 118.9(10) | O(10)#4-Rb(2)-O(14)#17  | 145.1(4) |
| O(7)-C(1)-O(5)        | 114.6(11) | O(12)#16-Rb(2)-O(1)     | 66.7(2)  |
| O(7)-C(1)-O(6)        | 126.5(12) | O(12)#16-Rb(2)-O(6)#4   | 66.2(2)  |
| O(12)-C(2)-O(13)      | 126.0(12) | O(12)#16-Rb(2)-O(8)#4   | 93.0(3)  |
| O(12)-C(2)-O(14)      | 119.0(11) | O(12)#16-Rb(2)-O(9)#3   | 146.1(3) |
| O(13)-C(2)-O(14)      | 115.0(11) | O(12)#16-Rb(2)-O(10)#4  | 64.6(4)  |
| O(1)-Mo(1)-O(2)       | 110.2(6)  | O(12)#16-Rb(2)-O(10)#3  | 148.8(4) |
| O(1)-Mo(1)-O(3)       | 109.1(5)  | O(12)#16-Rb(2)-O(14)#17 | 103.4(2) |
| O(1)-Mo(1)-O(4)       | 109.4(8)  | O(2)#19-Rb(3)-O(5)#9    | 100.7(3) |
| O(2)-Mo(1)-O(3)       | 109.7(7)  | O(2)#19-Rb(3)-O(7)#9    | 75.7(3)  |
| O(4)-Mo(1)-O(2)       | 110.1(6)  | O(2)#19-Rb(3)-O(8)#11   | 165.8(4) |
| O(4)-Mo(1)-O(3)       | 108.4(6)  | O(2)#19-Rb(3)-O(9)#18   | 108.7(3) |
| O(8)-Mo(2)-O(9)       | 110.8(9)  | O(2)#19-Rb(3)-O(11)#11  | 136.8(3) |
| O(8)-Mo(2)-O(10)      | 109.5(7)  | O(2)#19-Rb(3)-O(11)#18  | 69.3(3)  |
| O(8)-Mo(2)-O(11)      | 109.5(6)  | O(2)#19-Rb(3)-O(13)#4   | 87.4(4)  |
| O(9)-Mo(2)-O(10)      | 109.8(7)  | O(3)-Rb(3)-O(2)#19      | 74.5(4)  |
| O(11)-Mo(2)-O(9)      | 110.3(7)  | O(3)-Rb(3)-O(5)#9       | 119.5(3) |
| O(11)-Mo(2)-O(10)     | 106.8(10) | O(3)-Rb(3)-O(7)#9       | 80.4(3)  |
| O(5)#9-Rb(3)-O(7)#9   | 42.1(3)   | O(3)-Rb(3)-O(8)#11      | 103.6(3) |
| O(5)#9-Rb(3)-O(8)#11  | 92.5(3)   | O(3)-Rb(3)-O(9)#18      | 156.5(4) |
| O(5)#9-Rb(3)-O(9)#18  | 83.3(3)   | O(3)-Rb(3)-O(11)#18     | 143.1(3) |
| O(5)#9-Rb(3)-O(11)#11 | 72.3(4)   | O(3)-Rb(3)-O(11)#11     | 73.1(4)  |
| O(5)#9-Rb(3)-O(11)#18 | 62.6(3)   | O(3)-Rb(3)-O(13)#4      | 78.5(3)  |

|                         |          |                        |          |
|-------------------------|----------|------------------------|----------|
| O(7)#9-Rb(3)-O(8)#11    | 118.2(3) | O(10)#4-Rb(4)-O(5)#19  | 81.9(3)  |
| O(7)#9-Rb(3)-O(11)#11   | 71.5(3)  | O(10)#4-Rb(4)-O(6)     | 107.2(4) |
| O(7)#9-Rb(3)-O(11)#18   | 84.3(3)  | O(10)#4-Rb(4)-O(11)#4  | 51.8(5)  |
| O(8)#11-Rb(3)-O(11)#11  | 52.7(3)  | O(10)#4-Rb(4)-O(12)#4  | 137.5(4) |
| O(8)#11-Rb(3)-O(11)#18  | 113.2(3) | O(10)#4-Rb(4)-O(13)#4  | 179.3(5) |
| O(9)#18-Rb(3)-O(7)#9    | 123.1(4) | O(11)#4-Rb(4)-O(4)     | 85.6(4)  |
| O(9)#18-Rb(3)-O(8)#11   | 67.4(4)  | O(12)#4-Rb(4)-O(2)#19  | 100.4(2) |
| O(9)#18-Rb(3)-O(11)#11  | 112.6(4) | O(12)#4-Rb(4)-O(4)     | 127.5(3) |
| O(9)#18-Rb(3)-O(11)#18  | 50.0(3)  | O(12)#4-Rb(4)-O(5)#19  | 60.0(2)  |
| O(11)#11-Rb(3)-O(11)#18 | 132.4(6) | O(12)#4-Rb(4)-O(11)#4  | 90.6(3)  |
| O(13)#4-Rb(3)-O(5)#9    | 161.5(3) | O(13)#4-Rb(4)-O(2)#19  | 77.0(4)  |
| O(13)#4-Rb(3)-O(7)#9    | 155.9(5) | O(13)#4-Rb(4)-O(3)     | 75.5(3)  |
| O(13)#4-Rb(3)-O(8)#11   | 78.4(4)  | O(13)#4-Rb(4)-O(4)     | 105.2(4) |
| O(13)#4-Rb(3)-O(9)#18   | 78.3(4)  | O(13)#4-Rb(4)-O(4)#19  | 100.9(4) |
| O(13)#4-Rb(3)-O(11)#18  | 106.0(3) | O(13)#4-Rb(4)-O(5)#19  | 98.4(3)  |
| O(13)#4-Rb(3)-O(11)#11  | 112.9(4) | O(13)#4-Rb(4)-O(11)#4  | 128.8(4) |
| O(2)#19-Rb(4)-O(4)      | 111.9(3) | O(13)#4-Rb(4)-O(12)#4  | 43.0(3)  |
| O(2)#19-Rb(4)-O(11)#4   | 145.3(3) | O(1)#2-Rb(5)-O(3)#2    | 55.0(3)  |
| O(3)-Rb(4)-O(2)#19      | 65.2(3)  | O(1)#2-Rb(5)-O(13)#20  | 74.8(3)  |
| O(3)-Rb(4)-O(4)#19      | 116.4(4) | O(2)#12-Rb(5)-O(1)#2   | 117.5(4) |
| O(3)-Rb(4)-O(4)         | 51.2(4)  | O(2)#12-Rb(5)-O(3)#2   | 68.8(3)  |
| O(3)-Rb(4)-O(5)#19      | 162.0(3) | O(2)#12-Rb(5)-O(13)#20 | 121.5(4) |
| O(3)-Rb(4)-O(11)#4      | 136.5(3) | O(2)#12-Rb(5)-O(14)#20 | 84.3(3)  |
| O(3)-Rb(4)-O(12)#4      | 118.1(2) | O(7)-Rb(5)-O(1)#2      | 111.9(3) |
| O(4)#19-Rb(4)-O(2)#19   | 52.7(4)  | O(7)-Rb(5)-O(2)#12     | 77.8(3)  |
| O(4)#19-Rb(4)-O(4)      | 145.2(6) | O(7)-Rb(5)-O(3)#2      | 78.2(3)  |
| O(4)#19-Rb(4)-O(5)#19   | 47.4(4)  | O(7)-Rb(5)-O(13)#20    | 155.3(4) |
| O(4)#19-Rb(4)-O(11)#4   | 95.6(4)  | O(7)-Rb(5)-O(14)#20    | 161.4(3) |
| O(4)#19-Rb(4)-O(12)#4   | 87.3(3)  | O(8)-Rb(5)-O(1)#2      | 145.0(4) |
| O(5)#19-Rb(4)-O(2)#19   | 97.1(2)  | O(8)-Rb(5)-O(2)#12     | 96.4(3)  |
| O(5)#19-Rb(4)-O(4)      | 145.9(4) | O(8)-Rb(5)-O(3)#2      | 157.5(4) |
| O(5)#19-Rb(4)-O(11)#4   | 60.3(2)  | O(8)-Rb(5)-O(7)        | 82.2(4)  |
| O(6)-Rb(4)-O(2)#19      | 146.5(3) | O(8)-Rb(5)-O(9)#19     | 72.6(5)  |
| O(6)-Rb(4)-O(3)         | 92.2(2)  | O(8)-Rb(5)-O(13)#20    | 80.4(4)  |
| O(6)-Rb(4)-O(4)#19      | 148.9(4) | O(8)-Rb(5)-O(14)#20    | 105.0(4) |
| O(6)-Rb(4)-O(4)         | 62.7(3)  | O(9)#19-Rb(5)-O(1)#2   | 77.8(4)  |
| O(6)-Rb(4)-O(5)#19      | 102.4(2) | O(9)#19-Rb(5)-O(2)#12  | 158.0(5) |
| O(6)-Rb(4)-O(11)#4      | 68.0(3)  | O(9)#19-Rb(5)-O(3)#2   | 114.9(3) |
| O(6)-Rb(4)-O(12)#4      | 67.4(2)  | O(9)#19-Rb(5)-O(7)     | 81.8(4)  |
| O(6)-Rb(4)-O(13)#4      | 73.3(3)  | O(9)#19-Rb(5)-O(13)#20 | 76.3(4)  |
| O(10)#4-Rb(4)-O(2)#19   | 102.4(4) | O(9)#19-Rb(5)-O(14)#20 | 116.6(4) |
| O(10)#4-Rb(4)-O(3)      | 104.0(4) | O(13)#20-Rb(5)-O(3)#2  | 121.6(4) |
| O(10)#4-Rb(4)-O(4)      | 74.8(4)  | O(14)#20-Rb(5)-O(1)#2  | 72.1(4)  |
| O(10)#4-Rb(4)-O(4)#19   | 78.8(4)  | O(14)#20-Rb(5)-O(3)#2  | 90.7(3)  |



|                         |          |                      |          |
|-------------------------|----------|----------------------|----------|
| O(14)#20-Rb(5)-O(13)#20 | 42.7(3)  | O(7)#1-Rb(6)-O(8)#13 | 112.4(3) |
| O(2)#15-Rb(6)-O(5)#13   | 87.2(3)  | O(11)-Rb(6)-O(2)#15  | 76.2(4)  |
| O(2)#15-Rb(6)-O(8)#13   | 81.3(3)  | O(11)-Rb(6)-O(5)#13  | 68.7(3)  |
| O(5)#13-Rb(6)-O(8)#13   | 110.5(2) | O(11)-Rb(6)-O(6)#1   | 75.2(4)  |
| O(6)#1-Rb(6)-O(2)#15    | 144.3(2) | O(11)-Rb(6)-O(7)#13  | 100.7(3) |
| O(6)#1-Rb(6)-O(5)#13    | 101.7(2) | O(11)-Rb(6)-O(7)#1   | 76.2(3)  |
| O(6)#1-Rb(6)-O(7)#1     | 41.6(3)  | O(11)-Rb(6)-O(8)#13  | 157.5(5) |
| O(6)#1-Rb(6)-O(8)#13    | 125.5(2) | O(11)-Rb(6)-O(12)    | 109.1(4) |
| O(7)#13-Rb(6)-O(2)#15   | 71.6(3)  | O(12)-Rb(6)-O(2)#15  | 143.3(2) |
| O(7)#1-Rb(6)-O(2)#15    | 110.4(4) | O(12)-Rb(6)-O(5)#13  | 63.2(2)  |
| O(7)#1-Rb(6)-O(5)#13    | 135.5(3) | O(12)-Rb(6)-O(6)#1   | 67.7(2)  |
| O(7)#13-Rb(6)-O(5)#13   | 40.0(3)  | O(12)-Rb(6)-O(7)#1   | 106.0(3) |
| O(7)#13-Rb(6)-O(6)#1    | 134.8(3) | O(12)-Rb(6)-O(7)#13  | 71.8(3)  |
| O(7)#13-Rb(6)-O(7)#1    | 175.5(5) | O(12)-Rb(6)-O(8)#13  | 89.0(3)  |
| O(7)#13-Rb(6)-O(8)#13   | 71.7(3)  |                      |          |

---

Symmetry transformations used to generate equivalent atoms:

#1  $x-1/2,-y+1/2,z$     #2  $-x+1,-y,z+1/2$     #3  $x+1/2,-y+3/2,z$     #4  $x+1/2,-y+1/2,z$   
#5  $x-1,y,z$     #6  $x-1,y+1,z$     #7  $-x,-y+1,z-1/2$     #8  $x,y+1,z$     #9  $-x+1,-y,z-1/2$   
#10  $-x+1,-y+1,z-1/2$     #11  $-x+1/2,y-1/2,z-1/2$     #12  $-x+1,-y+1,z+1/2$     #13  $x-1/2,-y+3/2,z$   
#14  $-x+1/2,y+3/2,z+1/2$     #15  $-x+1/2,y+1/2,z+1/2$     #16  $x+1,y-1,z$     #17  $x+1,y,z$   
#18  $-x+1/2,y-3/2,z-1/2$     #19  $x,y-1,z$     #20  $-x,-y+1,z+1/2$

**Table S5** Bond distances [ $\text{\AA}$ ] and angles [ $^\circ$ ] for  $\text{Cs}_3\text{MoO}_4(\text{HCO}_3)$ .

|               |           |                       |            |
|---------------|-----------|-----------------------|------------|
| C(1)-O(8)     | 1.256(11) | O(9)#1-Cs(5)-O(9)#9   | 171.1(5)   |
| C(1)-O(9)     | 1.277(17) | O(9)#1-Cs(5)-O(10)#1  | 37.5(3)    |
| C(1)-O(10)    | 1.332(12) | O(9)#9-Cs(5)-O(10)#1  | 133.8(3)   |
| C(2)-O(1)     | 1.244(16) | O(9)#9-Cs(5)-O(4)#10  | 112.9(3)   |
| C(2)-O(2)     | 1.373(10) | O(9)#1-Cs(5)-O(4)#10  | 71.6(3)    |
| C(2)-O(3)     | 1.236(10) | O(9)#1-Cs(5)-O(8)#9   | 131.6(3)   |
| Mo(1)-O(4)    | 1.730(9)  | O(9)#1-Cs(5)-O(13)#9  | 73.3(3)    |
| Mo(1)-O(5)    | 1.721(9)  | O(9)#9-Cs(5)-O(13)#9  | 114.0(3)   |
| Mo(1)-O(6)    | 1.747(12) | O(9)#9-Cs(5)-O(5)#10  | 67.7(3)    |
| Mo(1)-O(7)    | 1.768(17) | O(9)#1-Cs(5)-O(5)#10  | 117.1(3)   |
| Mo(2)-O(11)   | 1.721(13) | O(11)-Cs(5)-O(9)#9    | 78.9(3)    |
| Mo(2)-O(12)   | 1.760(12) | O(11)-Cs(5)-O(9)#1    | 95.6(3)    |
| Mo(2)-O(13)   | 1.776(9)  | O(11)-Cs(5)-O(10)#1   | 66.5(2)    |
| Mo(2)-O(14)   | 1.768(9)  | O(11)-Cs(5)-O(3)#9    | 106.4(3)   |
| Cs(1)-O(9)#4  | 3.178(13) | O(11)-Cs(5)-O(4)#10   | 72.9(3)    |
| Cs(1)-O(11)#3 | 3.214(8)  | O(11)-Cs(5)-O(8)#9    | 77.9(3)    |
| Cs(1)-O(10)#4 | 3.134(9)  | O(11)-Cs(5)-O(13)#9   | 159.1(3)   |
| Cs(1)-O(4)    | 3.033(9)  | O(11)-Cs(5)-O(5)#10   | 68.6(3)    |
| Cs(1)-O(13)#3 | 3.194(9)  | O(10)#1-Cs(5)-O(4)#10 | 85.9(2)    |
| Cs(1)-O(5)#5  | 3.093(9)  | O(10)#1-Cs(5)-O(5)#10 | 121.3(2)   |
| Cs(1)-O(14)#2 | 3.110(10) | O(3)#9-Cs(5)-O(9)#1   | 70.2(3)    |
| Cs(1)-O(1)    | 3.138(14) | O(3)#9-Cs(5)-O(9)#9   | 104.3(3)   |
| Cs(2)-O(2)#6  | 3.531(8)  | O(3)#9-Cs(5)-O(10)#1  | 60.71(17)  |
| Cs(2)-O(3)#7  | 3.208(6)  | O(3)#9-Cs(5)-O(4)#10  | 141.55(18) |
| Cs(2)-O(4)#6  | 3.558(10) | O(3)#9-Cs(5)-O(8)#9   | 66.19(17)  |
| Cs(2)-O(8)#6  | 3.152(6)  | O(3)#9-Cs(5)-O(13)#9  | 86.8(2)    |
| Cs(2)-O(5)#6  | 3.774(11) | O(3)#9-Cs(5)-O(5)#10  | 171.03(17) |
| Cs(2)-O(14)#8 | 3.459(13) | O(4)#10-Cs(5)-O(5)#10 | 45.5(3)    |
| Cs(2)-O(6)    | 2.962(12) | O(8)#9-Cs(5)-O(9)#9   | 40.6(3)    |
| Cs(2)-O(7)#6  | 3.81(2)   | O(8)#9-Cs(5)-O(10)#1  | 100.48(18) |
| Cs(2)-O(1)#7  | 3.294(7)  | O(8)#9-Cs(5)-O(4)#10  | 144.61(19) |
| Cs(2)-O(1)#6  | 3.188(7)  | O(8)#9-Cs(5)-O(13)#9  | 122.84(19) |
| Cs(3)-O(11)#7 | 3.551(16) | O(8)#9-Cs(5)-O(5)#10  | 105.05(17) |
| Cs(3)-O(10)#5 | 3.433(9)  | O(13)#9-Cs(5)-O(10)#1 | 108.6(2)   |
| Cs(3)-O(12)#7 | 3.083(17) | O(13)#9-Cs(5)-O(4)#10 | 86.6(3)    |
| Cs(3)-O(3)    | 3.276(6)  | O(13)#9-Cs(5)-O(5)#10 | 100.1(3)   |
| Cs(3)-O(4)    | 3.238(12) | O(9)-Cs(6)-O(2)#10    | 163.1(3)   |
| Cs(3)-O(8)    | 3.158(6)  | O(9)-Cs(6)-O(4)#12    | 78.6(3)    |
| Cs(3)-O(5)#5  | 3.274(13) | O(9)-Cs(6)-O(5)#11    | 78.3(3)    |
| Cs(3)-O(7)#5  | 3.363(9)  | O(9)-Cs(6)-O(6)#11    | 107.8(2)   |
| Cs(3)-O(7)    | 3.341(8)  | O(9)-Cs(6)-O(6)#12    | 111.5(3)   |
| Cs(3)-O(1)    | 3.123(14) | O(9)-Cs(6)-O(1)#10    | 156.3(4)   |
| Cs(4)-O(9)#6  | 3.206(13) | O(2)#10-Cs(6)-O(4)#12 | 92.5(3)    |

|                       |           |                        |          |
|-----------------------|-----------|------------------------|----------|
| Cs(4)-O(2)#6          | 3.471(9)  | O(2)#10-Cs(6)-O(5)#11  | 85.1(3)  |
| Cs(4)-O(12)#7         | 3.459(7)  | O(2)#10-Cs(6)-O(6)#11  | 62.1(3)  |
| Cs(4)-O(12)#6         | 3.263(8)  | O(2)#10-Cs(6)-O(6)#12  | 72.0(3)  |
| Cs(4)-O(3)#7          | 3.116(6)  | O(2)#10-Cs(6)-O(1)#10  | 40.2(3)  |
| Cs(4)-O(8)#6          | 3.290(6)  | O(4)#12-Cs(6)-O(6)#11  | 112.6(3) |
| Cs(4)-O(13)#7         | 3.248(13) | O(4)#12-Cs(6)-O(6)#12  | 50.8(3)  |
| Cs(4)-O(14)#6         | 3.407(13) | O(4)#12-Cs(6)-O(1)#10  | 118.2(3) |
| Cs(4)-O(6)            | 3.456(14) | O(13)#13-Cs(6)-O(9)    | 81.4(3)  |
| Cs(4)-O(7)            | 3.13(2)   | O(13)#13-Cs(6)-O(2)#10 | 114.9(3) |
| Cs(5)-O(9)#9          | 3.311(6)  | O(13)#13-Cs(6)-O(4)#12 | 103.9(2) |
| Cs(5)-O(9)#1          | 3.169(6)  | O(13)#13-Cs(6)-O(5)#11 | 159.5(4) |
| Cs(5)-O(11)           | 2.993(13) | O(13)#13-Cs(6)-O(14)   | 73.6(4)  |
| Cs(5)-O(10)#1         | 3.555(8)  | O(13)#13-Cs(6)-O(6)#11 | 143.4(3) |
| Cs(5)-O(3)#9          | 3.155(6)  | O(13)#13-Cs(6)-O(6)#12 | 72.1(3)  |
| Cs(5)-O(4)#10         | 3.661(12) | O(13)#13-Cs(6)-O(1)#10 | 78.3(3)  |
| Cs(5)-O(8)#9          | 3.202(6)  | O(5)#11-Cs(6)-O(4)#12  | 69.1(3)  |
| Cs(5)-O(13)#9         | 3.504(9)  | O(5)#11-Cs(6)-O(6)#12  | 112.8(3) |
| Cs(5)-O(5)#10         | 3.730(13) | O(5)#11-Cs(6)-O(6)#11  | 49.0(3)  |
| Cs(6)-O(9)            | 3.107(14) | O(5)#11-Cs(6)-O(1)#10  | 122.2(3) |
| Cs(6)-O(2)#10         | 3.110(9)  | O(14)-Cs(6)-O(9)       | 84.6(3)  |
| Cs(6)-O(4)#12         | 3.229(10) | O(14)-Cs(6)-O(2)#10    | 103.6(3) |
| Cs(6)-O(13)#13        | 3.010(9)  | O(14)-Cs(6)-O(4)#12    | 163.3(4) |
| Cs(6)-O(5)#11         | 3.135(11) | O(14)-Cs(6)-O(5)#11    | 107.3(2) |
| Cs(6)-O(14)           | 3.022(10) | O(14)-Cs(6)-O(6)#11    | 72.2(3)  |
| Cs(6)-O(6)#12         | 3.446(9)  | O(14)-Cs(6)-O(6)#12    | 138.9(3) |
| Cs(6)-O(6)#11         | 3.662(9)  | O(14)-Cs(6)-O(1)#10    | 77.9(3)  |
| Cs(6)-O(1)#10         | 3.282(14) | O(6)#12-Cs(6)-O(6)#11  | 130.7(4) |
| O(9)#4-Cs(1)-O(11)#3  | 77.8(3)   | O(1)#10-Cs(6)-O(6)#12  | 73.6(3)  |
| O(9)#4-Cs(1)-O(13)#3  | 122.5(3)  | O(1)#10-Cs(6)-O(6)#11  | 82.1(2)  |
| O(10)#4-Cs(1)-O(9)#4  | 40.6(3)   | O(4)-Mo(1)-O(6)        | 111.1(5) |
| O(10)#4-Cs(1)-O(11)#3 | 75.2(3)   | O(4)-Mo(1)-O(7)        | 107.2(6) |
| O(10)#4-Cs(1)-O(13)#3 | 94.5(3)   | O(5)-Mo(1)-O(4)        | 111.8(7) |
| O(10)#4-Cs(1)-O(1)    | 164.2(3)  | O(5)-Mo(1)-O(6)        | 111.1(5) |
| O(4)-Cs(1)-O(9)#4     | 80.5(3)   | O(5)-Mo(1)-O(7)        | 107.1(6) |
| O(4)-Cs(1)-O(11)#3    | 143.7(3)  | O(6)-Mo(1)-O(7)        | 108.2(8) |
| O(4)-Cs(1)-O(10)#4    | 105.7(3)  | O(11)-Mo(2)-O(12)      | 111.0(8) |
| O(4)-Cs(1)-O(13)#3    | 157.0(3)  | O(11)-Mo(2)-O(13)      | 107.3(4) |
| O(4)-Cs(1)-O(5)#5     | 72.2(4)   | O(11)-Mo(2)-O(14)      | 108.8(5) |
| O(4)-Cs(1)-O(14)#2    | 100.3(2)  | O(12)-Mo(2)-O(13)      | 110.6(5) |
| O(4)-Cs(1)-O(1)       | 79.8(3)   | O(12)-Mo(2)-O(14)      | 110.9(5) |
| O(13)#3-Cs(1)-O(11)#3 | 52.1(3)   | O(14)-Mo(2)-O(13)      | 108.3(7) |
| O(5)#5-Cs(1)-O(9)#4   | 77.8(3)   | O(5)#5-Cs(1)-O(13)#3   | 109.2(2) |
| O(5)#5-Cs(1)-O(11)#3  | 74.9(3)   | O(5)#5-Cs(1)-O(14)#2   | 158.8(4) |
| O(5)#5-Cs(1)-O(10)#4  | 115.5(3)  | O(5)#5-Cs(1)-O(1)      | 80.2(3)  |

|                       |            |                       |            |
|-----------------------|------------|-----------------------|------------|
| O(14)#2-Cs(1)-O(9)#4  | 121.3(3)   | O(1)#6-Cs(2)-O(4)#6   | 71.6(3)    |
| O(14)#2-Cs(1)-O(11)#3 | 115.9(3)   | O(1)#7-Cs(2)-O(4)#6   | 114.5(3)   |
| O(14)#2-Cs(1)-O(10)#4 | 85.5(3)    | O(1)#7-Cs(2)-O(5)#6   | 68.8(3)    |
| O(14)#2-Cs(1)-O(13)#3 | 69.9(3)    | O(1)#6-Cs(2)-O(5)#6   | 117.3(3)   |
| O(14)#2-Cs(1)-O(1)    | 78.9(3)    | O(1)#7-Cs(2)-O(14)#8  | 113.6(3)   |
| O(1)-Cs(1)-O(9)#4     | 154.1(4)   | O(1)#6-Cs(2)-O(14)#8  | 73.2(3)    |
| O(1)-Cs(1)-O(11)#3    | 109.4(3)   | O(1)#6-Cs(2)-O(7)#6   | 92.0(3)    |
| O(1)-Cs(1)-O(13)#3    | 77.8(3)    | O(1)#7-Cs(2)-O(7)#6   | 88.4(3)    |
| O(2)#6-Cs(2)-O(4)#6   | 107.9(2)   | O(1)#6-Cs(2)-O(1)#7   | 170.6(5)   |
| O(2)#6-Cs(2)-O(5)#6   | 150.56(18) | C(2)#7-Cs(2)-O(2)#6   | 113.7(2)   |
| O(2)#6-Cs(2)-O(7)#6   | 110.6(2)   | C(2)#7-Cs(2)-O(4)#6   | 128.2(2)   |
| O(3)#7-Cs(2)-O(2)#6   | 100.53(18) | C(2)#7-Cs(2)-O(5)#6   | 84.8(2)    |
| O(3)#7-Cs(2)-O(4)#6   | 123.96(18) | C(2)#6-Cs(2)-O(5)#6   | 129.44(19) |
| O(3)#7-Cs(2)-O(5)#6   | 89.4(2)    | C(2)#7-Cs(2)-O(14)#8  | 126.1(2)   |
| O(3)#7-Cs(2)-O(14)#8  | 145.14(19) | C(2)#7-Cs(2)-O(7)#6   | 91.1(2)    |
| O(3)#7-Cs(2)-O(7)#6   | 80.3(2)    | C(2)#6-Cs(2)-O(7)#6   | 94.15(19)  |
| O(3)#7-Cs(2)-O(1)#7   | 39.8(3)    | O(10)#5-Cs(3)-O(11)#7 | 62.5(2)    |
| O(4)#6-Cs(2)-O(5)#6   | 45.8(3)    | O(12)#7-Cs(3)-O(11)#7 | 50.6(3)    |
| O(4)#6-Cs(2)-O(7)#6   | 44.8(3)    | O(12)#7-Cs(3)-O(10)#5 | 81.1(2)    |
| O(8)#6-Cs(2)-O(2)#6   | 60.62(17)  | O(12)#7-Cs(3)-O(3)    | 137.5(2)   |
| O(8)#6-Cs(2)-O(3)#7   | 66.81(17)  | O(12)#7-Cs(3)-O(4)    | 105.2(3)   |
| O(8)#6-Cs(2)-O(4)#6   | 86.7(2)    | O(12)#7-Cs(3)-O(8)    | 110.5(2)   |
| O(8)#6-Cs(2)-O(5)#6   | 99.5(2)    | O(12)#7-Cs(3)-O(5)#5  | 102.8(3)   |
| O(8)#6-Cs(2)-O(14)#8  | 141.81(18) | O(12)#7-Cs(3)-O(7)#5  | 79.1(4)    |
| O(8)#6-Cs(2)-O(7)#6   | 56.8(3)    | O(12)#7-Cs(3)-O(7)    | 79.1(4)    |
| O(8)#6-Cs(2)-O(1)#7   | 103.9(3)   | O(12)#7-Cs(3)-O(1)    | 177.8(3)   |
| O(8)#6-Cs(2)-O(1)#6   | 68.7(3)    | O(12)#7-Cs(3)-C(2)    | 156.7(3)   |
| O(5)#6-Cs(2)-O(7)#6   | 43.5(3)    | O(3)-Cs(3)-O(11)#7    | 92.2(2)    |
| O(14)#8-Cs(2)-O(2)#6  | 87.2(2)    | O(3)-Cs(3)-O(10)#5    | 61.01(17)  |
| O(14)#8-Cs(2)-O(4)#6  | 84.4(3)    | O(3)-Cs(3)-O(7)#5     | 86.4(3)    |
| O(14)#8-Cs(2)-O(5)#6  | 100.4(3)   | O(3)-Cs(3)-O(7)       | 124.4(3)   |
| O(14)#8-Cs(2)-O(7)#6  | 128.9(3)   | O(4)-Cs(3)-O(11)#7    | 136.6(2)   |
| O(6)-Cs(2)-O(2)#6     | 65.0(2)    | O(4)-Cs(3)-O(10)#5    | 159.3(2)   |
| O(6)-Cs(2)-O(3)#7     | 76.7(2)    | O(4)-Cs(3)-O(3)       | 117.1(2)   |
| O(6)-Cs(2)-O(4)#6     | 159.3(3)   | O(4)-Cs(3)-O(5)#5     | 67.3(3)    |
| O(6)-Cs(2)-O(8)#6     | 104.6(3)   | O(4)-Cs(3)-O(7)#5     | 115.7(3)   |
| O(6)-Cs(2)-O(5)#6     | 144.4(2)   | O(4)-Cs(3)-O(7)       | 50.7(3)    |
| O(6)-Cs(2)-O(14)#8    | 76.0(3)    | O(8)-Cs(3)-O(11)#7    | 70.7(2)    |
| O(6)-Cs(2)-O(7)#6     | 155.1(4)   | O(8)-Cs(3)-O(10)#5    | 104.06(18) |
| O(6)-Cs(2)-O(1)#7     | 80.1(3)    | O(8)-Cs(3)-O(3)       | 65.27(17)  |
| O(6)-Cs(2)-O(1)#6     | 95.9(3)    | O(8)-Cs(3)-O(4)       | 92.3(2)    |
| O(1)#7-Cs(2)-O(2)#6   | 133.9(3)   | O(8)-Cs(3)-O(5)#5     | 144.7(2)   |
| O(1)#6-Cs(2)-O(2)#6   | 37.8(3)    | O(8)-Cs(3)-O(7)#5     | 147.5(3)   |
| O(1)#6-Cs(2)-O(3)#7   | 131.1(3)   | O(8)-Cs(3)-O(7)       | 62.1(3)    |

|                       |            |                       |            |
|-----------------------|------------|-----------------------|------------|
| O(5)#5-Cs(3)-O(11)#7  | 143.5(2)   | O(3)#7-Cs(4)-O(8)#6   | 66.22(17)  |
| O(5)#5-Cs(3)-O(10)#5  | 92.2(2)    | O(3)#7-Cs(4)-O(13)#7  | 92.1(2)    |
| O(5)#5-Cs(3)-O(3)     | 97.6(2)    | O(3)#7-Cs(4)-O(14)#6  | 144.2(2)   |
| O(5)#5-Cs(3)-O(7)     | 115.0(3)   | O(3)#7-Cs(4)-O(6)     | 71.2(2)    |
| O(5)#5-Cs(3)-O(7)#5   | 50.0(3)    | O(3)#7-Cs(4)-O(7)     | 109.2(3)   |
| O(7)-Cs(3)-O(11)#7    | 86.8(3)    | O(8)#6-Cs(4)-O(2)#6   | 60.08(16)  |
| O(7)#5-Cs(3)-O(11)#7  | 96.1(3)    | O(8)#6-Cs(4)-O(12)#7  | 125.8(3)   |
| O(7)#5-Cs(3)-O(10)#5  | 45.2(3)    | O(8)#6-Cs(4)-O(14)#6  | 97.9(2)    |
| O(7)-Cs(3)-O(10)#5    | 149.3(3)   | O(8)#6-Cs(4)-O(6)     | 91.6(2)    |
| O(7)-Cs(3)-O(7)#5     | 149.0(6)   | O(13)#7-Cs(4)-O(2)#6  | 159.3(2)   |
| O(1)-Cs(3)-O(11)#7    | 127.9(3)   | O(13)#7-Cs(4)-O(12)#6 | 115.8(3)   |
| O(1)-Cs(3)-O(10)#5    | 96.7(2)    | O(13)#7-Cs(4)-O(12)#7 | 51.3(3)    |
| O(1)-Cs(3)-O(3)       | 40.4(3)    | O(13)#7-Cs(4)-O(8)#6  | 116.85(19) |
| O(1)-Cs(3)-O(4)       | 77.0(3)    | O(13)#7-Cs(4)-O(14)#6 | 65.7(3)    |
| O(1)-Cs(3)-O(8)       | 69.5(2)    | O(13)#7-Cs(4)-O(6)    | 138.2(2)   |
| O(1)-Cs(3)-O(5)#5     | 77.7(3)    | O(14)#6-Cs(4)-O(2)#6  | 93.9(2)    |
| O(1)-Cs(3)-O(7)       | 102.6(4)   | O(14)#6-Cs(4)-O(12)#7 | 113.6(3)   |
| O(1)-Cs(3)-O(7)#5     | 99.8(4)    | O(14)#6-Cs(4)-O(6)    | 143.8(2)   |
| O(9)#6-Cs(4)-O(2)#6   | 96.3(2)    | O(6)-Cs(4)-O(2)#6     | 61.15(18)  |
| O(9)#6-Cs(4)-O(12)#6  | 99.9(3)    | O(6)-Cs(4)-O(12)#7    | 87.6(3)    |
| O(9)#6-Cs(4)-O(12)#7  | 103.8(3)   | O(7)-Cs(4)-O(9)#6     | 178.8(4)   |
| O(9)#6-Cs(4)-O(8)#6   | 40.7(2)    | O(7)-Cs(4)-O(2)#6     | 82.8(2)    |
| O(9)#6-Cs(4)-O(13)#7  | 76.4(3)    | O(7)-Cs(4)-O(12)#6    | 80.0(3)    |
| O(9)#6-Cs(4)-O(14)#6  | 77.2(3)    | O(7)-Cs(4)-O(12)#7    | 76.7(3)    |
| O(9)#6-Cs(4)-O(6)     | 127.9(3)   | O(7)-Cs(4)-O(8)#6     | 138.2(3)   |
| O(12)#6-Cs(4)-O(2)#6  | 45.6(2)    | O(7)-Cs(4)-O(13)#7    | 104.7(3)   |
| O(12)#7-Cs(4)-O(2)#6  | 148.8(3)   | O(7)-Cs(4)-O(14)#6    | 103.7(3)   |
| O(12)#6-Cs(4)-O(12)#7 | 147.9(5)   | O(7)-Cs(4)-O(6)       | 51.0(4)    |
| O(12)#6-Cs(4)-O(8)#6  | 86.2(3)    | O(9)-C(1)-O(10)       | 114.1(9)   |
| O(12)#6-Cs(4)-O(14)#6 | 51.6(3)    | O(8)-C(1)-O(9)        | 126.4(10)  |
| O(12)#6-Cs(4)-O(6)    | 94.7(3)    | O(8)-C(1)-O(10)       | 119.5(9)   |
| O(3)#7-Cs(4)-O(9)#6   | 70.2(2)    | O(3)-C(2)-O(2)        | 118.9(8)   |
| O(3)#7-Cs(4)-O(2)#6   | 103.73(18) | O(3)-C(2)-O(1)        | 126.7(9)   |
| O(3)#7-Cs(4)-O(12)#7  | 62.5(3)    | O(1)-C(2)-O(2)        | 114.4(9)   |
| O(3)#7-Cs(4)-O(12)#6  | 147.9(3)   |                       |            |

---

Symmetry transformations used to generate equivalent atoms:

#1  $x-1/2, -y+1/2, z$     #2  $-x+1, -y+1, z-1/2$     #3  $-x+1, -y+2, z-1/2$     #4  $-x+3/2, y+1/2, z-1/2$

#5  $x, y+1, z$     #6  $x+1/2, -y+1/2, z$     #7  $x+1/2, -y+3/2, z$     #8  $-x+3/2, y-1/2, z-1/2$

#9  $x-1/2, -y+3/2, z$     #10  $-x+1, -y+1, z+1/2$     #11  $-x+3/2, y+1/2, z+1/2$

#12  $-x+3/2, y-1/2, z+1/2$     #13  $x, y-1, z$     #14  $-x+1, -y+2, z+1/2$

**Table S6** Carbonates with cut-off edge reported.

| Compound                                                          | Space group             | Noncentrosymmetric | Cut-off edge (nm) |
|-------------------------------------------------------------------|-------------------------|--------------------|-------------------|
| Na <sub>2</sub> CO <sub>3</sub>                                   | <i>C2/m</i>             | No (N)             | 221               |
| K <sub>2</sub> CO <sub>3</sub>                                    | <i>P2<sub>1</sub>/c</i> | N                  | 225               |
| Rb <sub>2</sub> CO <sub>3</sub>                                   | <i>P2<sub>1</sub>/c</i> | N                  | 237               |
| Cs <sub>2</sub> CO <sub>3</sub>                                   | <i>P2<sub>1</sub>/c</i> | N                  | 328               |
| NaHCO <sub>3</sub>                                                | <i>P2<sub>1</sub>/c</i> | N                  | < 190             |
| KHCO <sub>3</sub>                                                 | <i>P2<sub>1</sub>/a</i> | N                  | < 190             |
| RbHCO <sub>3</sub>                                                | <i>C<sup>1</sup></i>    | N                  | < 190             |
| CsHCO <sub>3</sub>                                                | <i>P2<sub>1</sub>/n</i> | N                  | < 190             |
| LiKCO <sub>3</sub>                                                | <i>P2<sub>1</sub>/c</i> | N                  | 196               |
| LiRbCO <sub>3</sub>                                               | <i>P2<sub>1</sub>/n</i> | N                  | 197               |
| LiCsCO <sub>3</sub>                                               | <i>P2<sub>1</sub>/n</i> | N                  | 200               |
| LiZn(OH)CO <sub>3</sub>                                           | <i>Pmn2<sub>1</sub></i> | Yes(Y)             | < 190             |
| NaY(CO <sub>3</sub> ) <sub>2</sub>                                | <i>P2<sub>1</sub>/c</i> | N                  | < 200             |
| NaZnCO <sub>3</sub> (OH)                                          | <i>Pc</i>               | Y                  | 200               |
| Na <sub>4</sub> Zn(CO <sub>3</sub> ) <sub>3</sub>                 | <i>P2<sub>1</sub>/c</i> | N                  | 305               |
| KY(CO <sub>3</sub> ) <sub>2</sub>                                 | <i>C2/c</i>             | N                  | < 200             |
| KEu(CO <sub>3</sub> ) <sub>2</sub>                                | <i>C2/c</i>             | N                  | 297               |
| KGd(CO <sub>3</sub> ) <sub>2</sub>                                | <i>C2/c</i>             | N                  | 273               |
| KTb(CO <sub>3</sub> ) <sub>2</sub>                                | <i>C2/c</i>             | N                  | 249               |
| Na <sub>3</sub> Gd(CO <sub>3</sub> ) <sub>3</sub>                 | <i>Ama2</i>             | Y                  | 220               |
| Na <sub>3</sub> Y(CO <sub>3</sub> ) <sub>3</sub>                  | <i>Ama2</i>             | Y                  | 220               |
| Na <sub>4</sub> La <sub>2</sub> (CO <sub>3</sub> ) <sub>5</sub>   | <i>P6<sub>3</sub>mc</i> | Y                  | 235               |
| Na <sub>5</sub> CsCa <sub>5</sub> (CO <sub>3</sub> ) <sub>8</sub> | <i>P6<sub>3</sub>mc</i> | Y                  | 210               |

**Figure S1** Experimental and theoretical powder XRD patterns for  $\text{Rb}_3\text{MoO}_4(\text{HCO}_3)$  (a) and  $\text{Cs}_3\text{MoO}_4(\text{HCO}_3)$  (b).

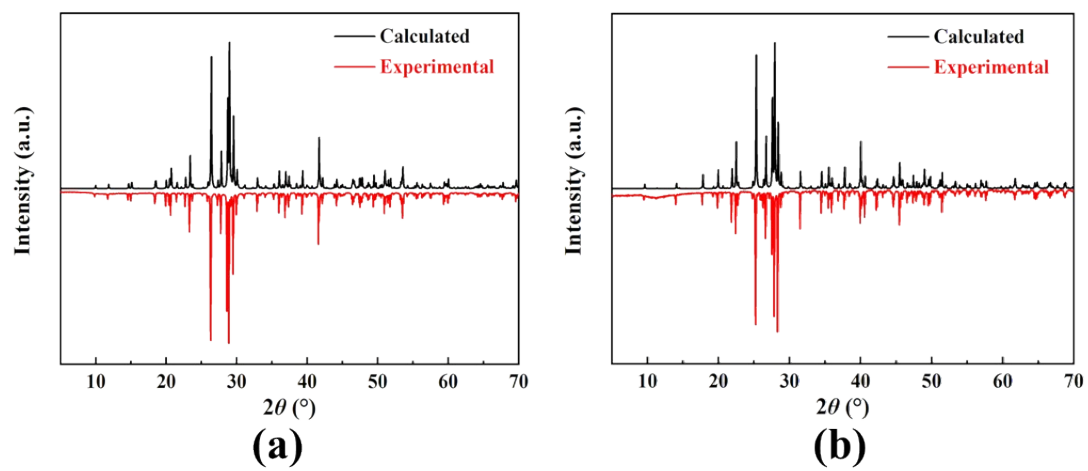

**Figure S2** The arrangement of  $[\text{MoO}_4]$  tetrahedral groups of  $\text{Rb}_3\text{MoO}_4(\text{HCO}_3)$  (a) (b) and  $\text{Cs}_3\text{MoO}_4(\text{HCO}_3)$  (c) (d).

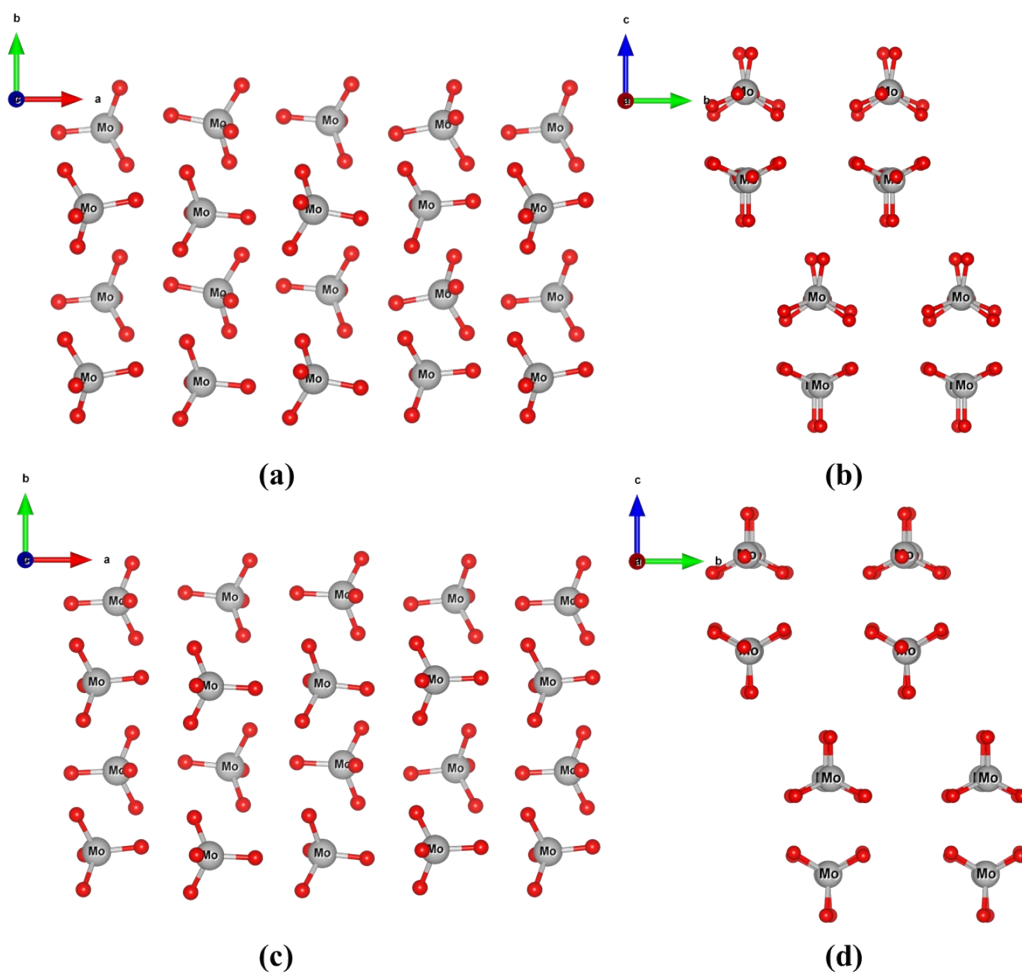



**Figure S3** The cationic coordination environment of  $M_3MoO_4(HCO_3)$  ( $M = Rb, Cs$ ).

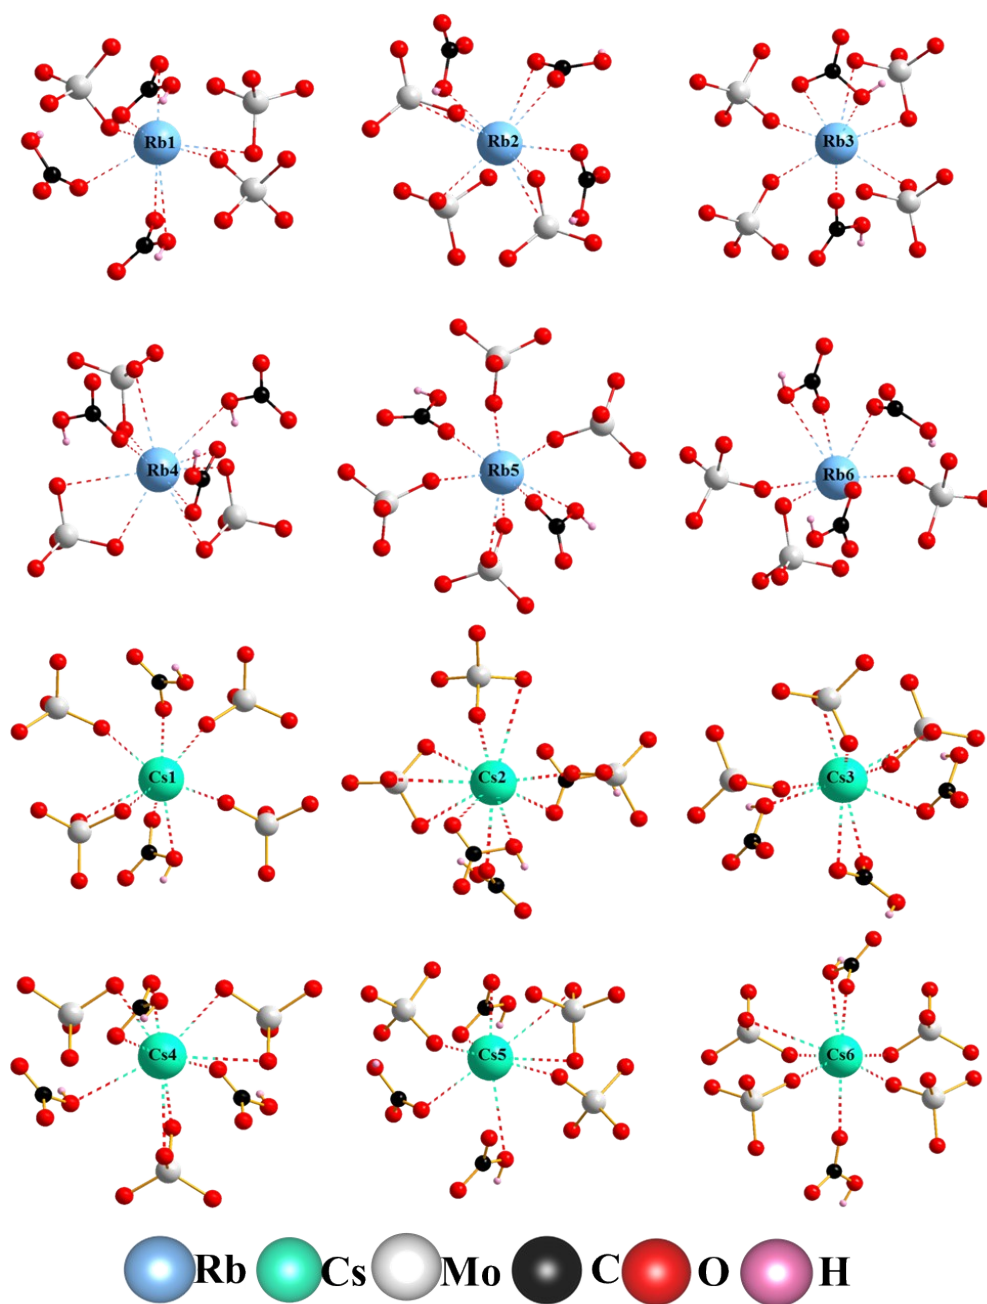

**Figure S4** The crystal structure of  $\text{Cs}_3\text{MoO}_4(\text{HCO}_3)$ .

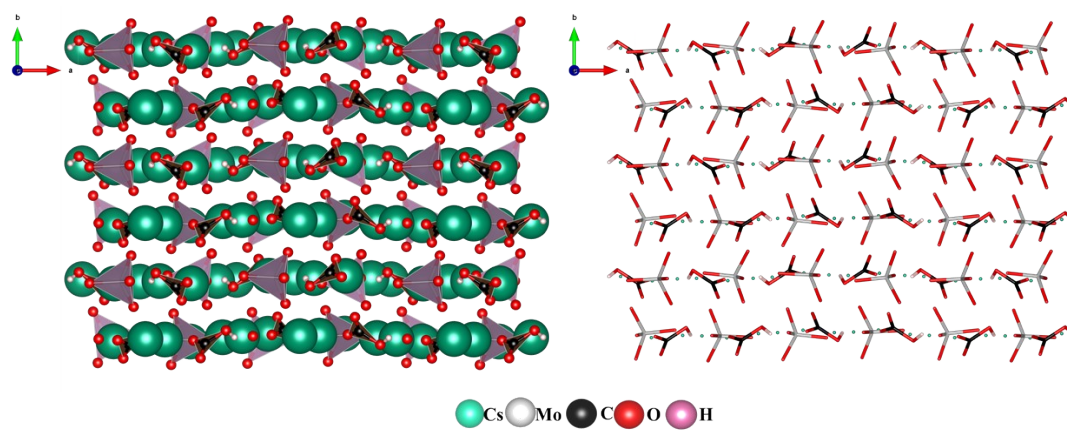

**Figure S5** The adjacent plane  $[\text{HCO}_3]$  anion groups' dihedral angle of  $\text{Rb}_3\text{MoO}_4(\text{HCO}_3)$  (a) and  $\text{Cs}_3\text{MoO}_4(\text{HCO}_3)$  (b).

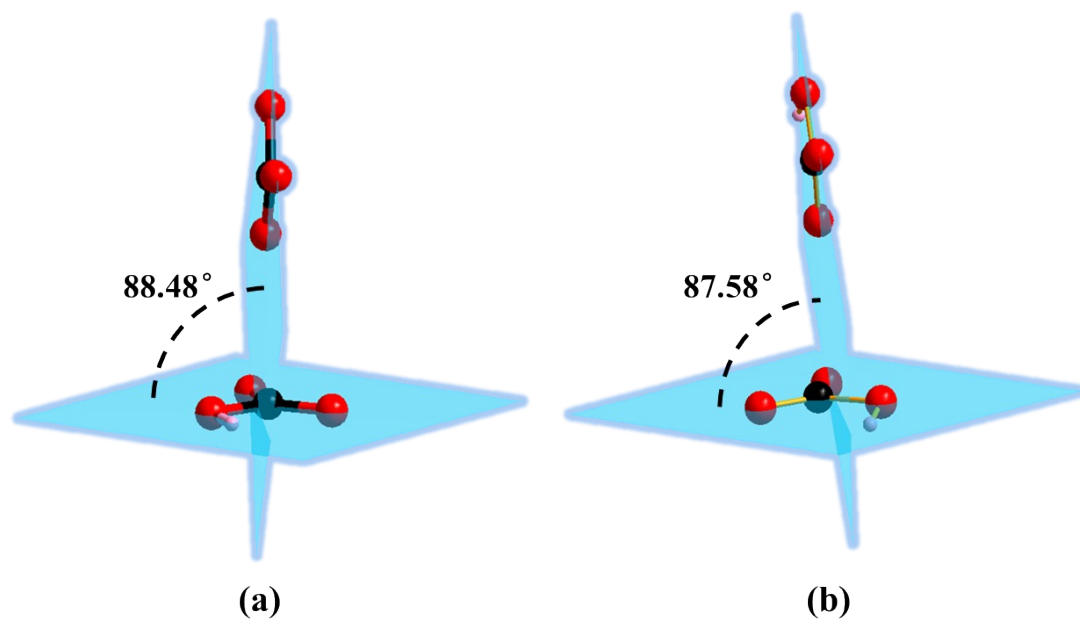

**Figure S6** FTIR spectra for  $\text{Rb}_3\text{MoO}_4(\text{HCO}_3)$  (a) and  $\text{Cs}_3\text{MoO}_4(\text{HCO}_3)$  (b).

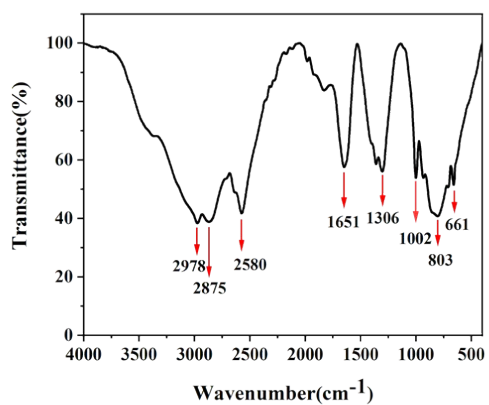

**(a)**

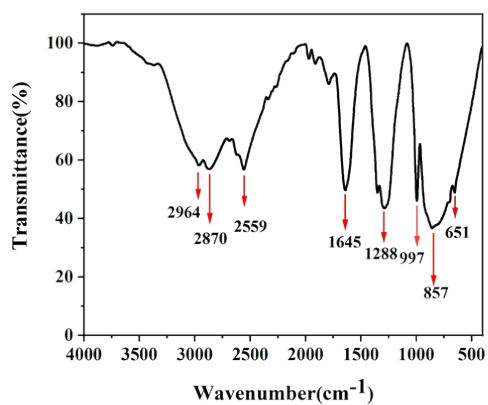

**(b)**

**Figure S7** The UV-vis absorption spectra for  $\text{Rb}_3\text{MoO}_4(\text{HCO}_3)$  (a) and  $\text{Cs}_3\text{MoO}_4(\text{HCO}_3)$  (b).

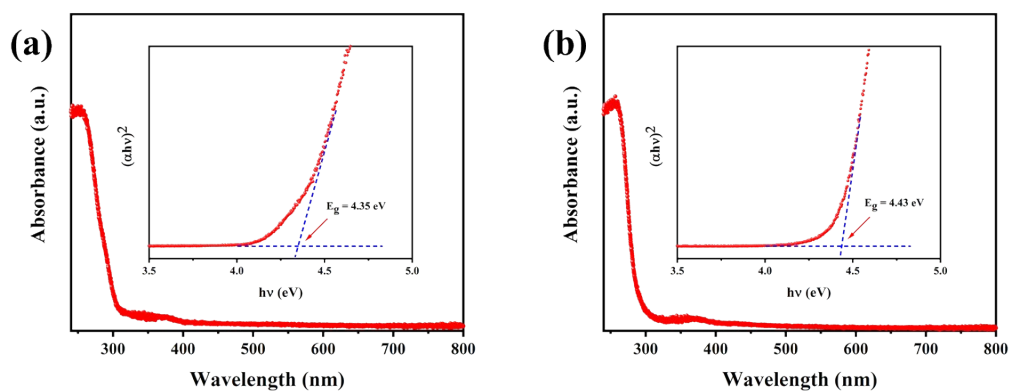

**Figure S8** SHG density of the virtual electron occupied and unoccupied states for  $\text{Rb}_3\text{MoO}_4(\text{HCO}_3)$  (a) (b) and  $\text{Cs}_3\text{MoO}_4(\text{HCO}_3)$  (c) (d).

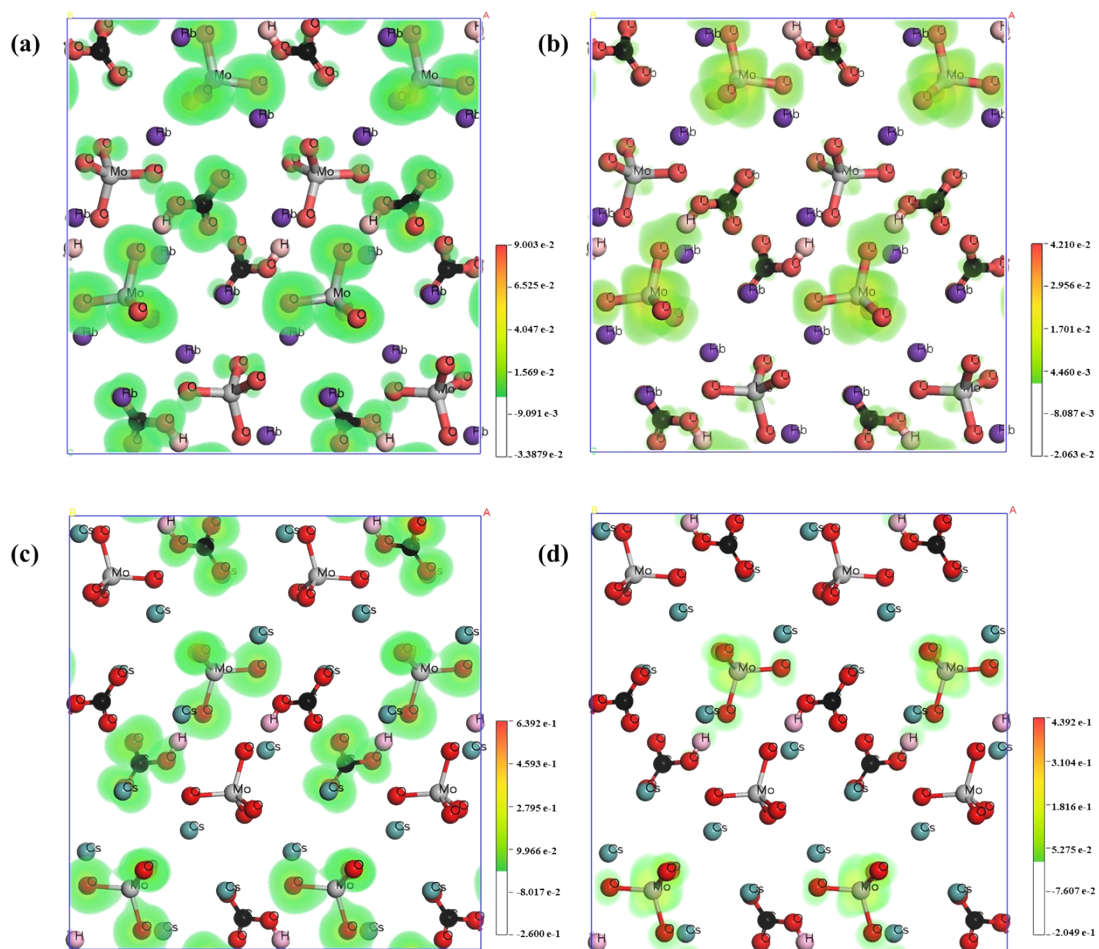

Supplement: d4tc05261g1.pdf [file d4tc05261g1.pdf]
